# Supplementary material for: Staphylococci phages display vast genomic diversity and evolutionary relationships
Source: PubMed Central journal article supplement (PMC6507118; doi:10.1186/s12864-019-5647-8), 2019-05-09

# pt99F3

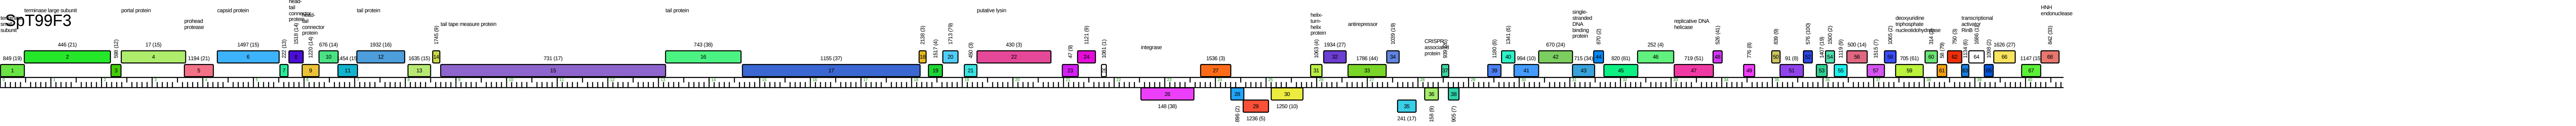

Supplement: 12864_2019_5647_MOESM19_ESM.pdf [file 12864_2019_5647_MOESM19_ESM.pdf]
