# Supplementary material for: Staphylococci phages display vast genomic diversity and evolutionary relationships
Source: BMC Genomics. 2019 May 9;20:357. doi: 10.1186/s12864-019-5647-8 (PMC6507118; doi:10.1186/s12864-019-5647-8)
Supplement: Supplementary file 34 — Integrases, attB sites and virulence genes. The dataset includes all cluster B staphylococcal siphoviruses (n = 132), for which five integrases types, five attB sites and 13 virulence factors were identified. The integrases were identified through Phamerator and BLASTP. The attB site was found through BLASTP using best host species hit similar to the one originally used to isolate the phage. The virulence genes were retrieved from Additional file 2 and re-organized. (XLSX 72 kb) [file 12864_2019_5647_MOESM34_ESM.xlsx]

## Sheet: integrases, virulence genes
					Integrases								Integration sites		Virulence determinants
					Y-Int				S-Int						virE	hol-Tox	lukF-PV	scn	pemK-like	virE	hol-Tox	sak	mazF	eta	lukS-PV	sea	chp	hlb
Cluster (subcluster)	Phage Name	Phage Accession Number	Host	Coagolase-type	Pham 148	Pham 280	Pham 1656	Pham 1661	pham 288	Strain	Strain coordinates	attB sequence	attB gene	Locus	Pham 297	Pham 529	Pham 555	Pham 914	Pham 1259	Pham 1270	Pham 1322	Pham 1460	Pham 1579	Pham 1903	Pham 1939	Pham 2064	Pham 2122	Pham 1597	Number of virulence genes/phage
B (B1)	SpT252	KX827370.1	pseudintermedius	CoPS	-	Yes	-	-	-	-	-	-	-	-	-	-	-	-	-	-	-	-	-	-	-	-	-	-	0
B (B1)	SN13	MF428478.1	pseudintermedius	CoPS	-	Yes	-	-	-	-	-	-	-	-	-	-	-	-	-	-	-	-	-	-	-	-	-	-	0
B (B1)	SN11	MF428479.1	pseudintermedius	CoPS	-	Yes	-	-	-	-	-	-	-	-	-	-	-	-	-	-	-	-	-	-	-	-	-	-	0
B (B1)	SN10	MF428480.1	pseudintermedius	CoPS	-	Yes	-	-	-	-	-	-	-	-	-	-	-	-	-	-	-	-	-	-	-	-	-	-	0
B (B1)	SN8	MF428481.1	pseudintermedius	CoPS	-	Yes	-	-	-	-	-	-	-	-	-	-	-	-	-	-	-	-	-	-	-	-	-	-	0
B (B1)	SpT5	KX827368.1	pseudintermedius	CoPS	-	Yes	-	-	-	-	-		-	-	-	-	-	-	-	-	-	-	-	-	-	-	-	-	0
B (B1)	SpT152	KX827369.1	pseudintermedius	CoPS	-	Yes	-	-	-	-	-	-	-	-	-	-	-	-	-	-	-	-	-	-	-	-	-	-	0
B (B2)	187	NC_007047.1	aureus	CoPS	-	Yes	-	-	-	-	-	-	-	-	-	-	-	-	-	-	-	-	-	-	-	-	-	-	0
B (B2)	TEM126	HQ127381.1	aureus	CoPS	Yes	-	-	-	Yes	-	-	-	-	-	-	-	-	-	-	-	-	-	-	-	-	-	-	-	0
B (B2)	phiSauS-IPLA88	NC_011614.1	aureus	CoPS	Yes	-	-	-	-	-	-	-	-	-	-	-	-	-	-	-	-	-	-	-	-	-	-	-	0
B (B2)	TEM123	NC_017968.1	aureus	CoPS	-	-	-	-	Yes	-	-	-	-	-	-	-	-	-	-	-	-	-	-	-	-	-	-	-	0
B (B2)	SA12	NC_021801.1	aureus	CoPS	-	-	-	-	Yes	-	-	-	-	-	-	-	-	-	Yes	-	-	-	-	-	-	-	-	-	1
B (B2)	SP6	JX274647.1	aureus	CoPS	-	-	-	-	Yes	-	-	-	-	-	-	-	-	-	Yes	-	-	-	-	-	-	-	-	-	1
B (B2)	SP5	JX274646.1	aureus	CoPS	-	-	-	-	Yes	-	-	-	-	-	-	-	-	-	Yes	-	-	-	-	-	-	-	-	-	1
B (B2)	phiNM1	NC_008583.1	aureus	CoPS	-	Yes	-	-	-	-	-	-	-	-	-	-	-	-	-	-	-	-	-	-	-	-	-	-	0
B (B2)	phiNM2	NC_028913.1	aureus	CoPS	-	-	-	-	Yes	-	-	-	-	-	-	-	-	-	-	-	-	-	-	-	-	-	-	-	0
B (B2)	80alpha	NC_009526.1	aureus	CoPS	-	-	-	-	Yes	-	-	-	-	-	-	-	-	-	-	-	-	-	-	-	-	-	-	-	0
B (B2)	53	NC_007049.1	aureus	CoPS	-	-	-	-	Yes	-	-	-	-	-	-	-	-	-	-	-	-	-	-	-	-	-	-	-	0
B (B2)	85	NC_007050.1	aureus	CoPS	-	-	-	-	Yes	-	-	-	-	-	-	-	-	-	Yes	-	-	-	-	-	-	-	-	-	1
B (B2)	phiMR25	NC_010808.1	aureus	CoPS	-	Yes	-	-	-	-	-	-	-	-	-	-	-	-	Yes	-	-	-	-	-	-	-	-	-	1
B (B2)	SA97	NC_029010.1	aureus	CoPS	-	Yes	-	-	-	-	-	-	-	-	-	-	-	-	-	-	-	-	-	-	-	-	-	-	0
B (B2)	phiETA2	NC_008798.1	aureus	CoPS	-	Yes	-	-	-	-	-	-	-	-	-	-	-	-	-	-	-	-	-	Yes	-	-	-	-	1
B (B2)	69	NC_007048.1	aureus	CoPS	-	Yes	-	-	-	-	-	-	-	-	-	-	-	-	-	-	-	-	-	-	-	-	-	-	0
B (B2)	Sap26	NC_014460.1	aureus	CoPS	-	Yes	-	-	-	-	-	-	-	-	-	-	-	-	-	-	-	-	-	-	-	-	-	-	0
B (B2)	Lorac	MH321492.1	aureus	CoPS	-	-	-	-	Yes	-		-			-	-	-	-	-	-	-	-	-	-	-	-	-	-	0
B (B2)	11	NC_004615.1	aureus	CoPS	-	Yes	-	-	-	-	-	-	-	-	-	-	-	-	-	-	-	-	-	-	-	-	-	-	0
B (B3)	DW2	NC_024391.1	aureus	CoPS	-	-	-	-	Yes	-	-	-	-	-	-	-	-	-	-	-	-	-	-	-	-	-	-	-	0
B (B3)	StauST398-3	NC_021332.1	aureus	CoPS	Yes	-	-	-	-	CP022897	790343-790358	AATCCCGCCGTCTCCA	1 - tmRNA	CGP93_00697	-	-	-	-	-	-	-	-	-	-	-	-	-	-	0
B (B3)	96	NC_007057.1	aureus	CoPS	Yes	-	-	-	-	CP022897	790344-790358	ATCCCGCCGTCTCCA	1 - tmRNA	CGP93_00697	-	-	-	-	-	-	-	-	-	-	-	-	-	-	0
B (B3)	phiJB	NC_028669.1	aureus	CoPS	-	-	-	Yes	-	CP022682	310192-310202	GGATGGGATTAA	2 - lipase (geh)	CGP84_00258	-	-	-	-	-	-	-	-	-	-	-	-	-	-	0
B (B3)	phiNM4	NC_028864.1	aureus	CoPS	-	-	-	Yes	-	CP022682	310191-310202	GGATGGGATTAA	2 - lipase (geh)	CGP84_00258	-	-	-	-	-	-	-	-	-	-	-	-	-	-	0
B (B3)	B166	NC_028859.1	aureus	CoPS	-	Yes	-	-	-	-	-	-	-	-	-	-	-	-	-	-	-	-	-	Yes	-	-	-	-	1
B (B3)	phiETA3	NC_008799.1	aureus	CoPS	-	Yes	-	-	-	-	-	-	-	-	-	-	-	-	-	-	-	-	-	Yes	-	-	-	-	1
B (B3)	3MRA	NC_028917.1	aureus	CoPS	-	Yes	-	-	-	-	-	-	-	-	-	-	-	-	-	-	-	-	-	-	-	-	-	-	0
B (B3)	phiMR11	NC_010147.1	aureus	CoPS	-	-	-	-	Yes	-	-	-	-	-	-	-	-	-	-	-	-	-	-	-	-	-	-	-	0
B (B3)	80	NC_030652.1	aureus	CoPS	-	-	-	Yes	-	-	-	-	-	-	-	-	-	-	-	-	-	-	-	-	-	-	-	-	0
B (B3)	52A	NC_007062.1	aureus	CoPS	-	-	-	Yes	-	-	-	-	-	-	-	-	-	-	-	-	-	-	-	-	-	-	-	-	0
B (B3)	StauST398-1	NC_021326.1	aureus	CoPS	Yes	-	-	-	-	-	-	-	-	-	-	-	-	Yes	-	-	-	-	-	-	-	-	-	-	1
B (B3)	StauST398-5	NC_023500.1	aureus	CoPS	Yes	-	-	-	-	CP022682	835331-835370	TCAGGACCTCTGGACGCGGGTTCAAATCCCGCCGTCTCCA	1 - tmRNA	CGP84_00765	-	-	-	-	-	-	-	-	-	-	-	-	-	-	0
B (B3)	55	NC_007060.1	aureus	CoPS	-	Yes	-	-	-	-	-	-	-	-	-	-	-	-	-	-	-	-	-	-	-	-	-	-	0
B (B3)	55-3	KR709303.1	aureus	CoPS	-	Yes	-	-	-	-	-		-	-	-	-	-	-	-	-	-	-	-	-	-	-	-	-	0
B (B3)	55-2	KR709302.1	aureus	CoPS	-	Yes	-	-	-	-	-		-	-	-	-	-	-	-	-	-	-	-	-	-	-	-	-	0
B (B3)	88	NC_007063.1	aureus	CoPS	-	Yes	-	-	-	-	-	-	-	-	-	-	-	-	-	-	-	-	-	-	-	-	-	-	0
B (B3)	UPMK_2	MG564297.1	aureus	CoPS	-	-	-	-	Yes	-	-	-	-	-	-	-	-	-	Yes	-	-	-	-	-	-	-	-	-	1
B (B3)	92	NC_007064.1	aureus	CoPS	-	-	-	-	Yes	-	-	-	-	-	-	-	-	-	Yes	-	-	-	-	-	-	-	-	-	1
B (B3)	SA13	NC_021863.1	aureus	CoPS	-	-	-	-	Yes	-	-	-	-	-	-	-	-	-	Yes	-	-	-	-	-	-	-	-	-	1
B (B3)	71	NC_007059.1	aureus	CoPS	-	Yes	-	-	-	-	-	-	-	-	-	-	-	-	-	-	-	-	-	-	-	-	-	-	0
B (B3)	phiETA	NC_003288.1	aureus	CoPS	-	Yes	-	-	-	-	-	-	-	-	-	-	-	-	-	-	-	-	-	Yes	-	-	-	-	1
B (B3)	B236	NC_028915.1	aureus	CoPS	-	Yes	-	-	-	-	-	-	-	-	-	-	-	-	Yes	-	-	-	-	Yes	-	-	-	-	2
B (B3)	X2	NC_007065.1	aureus	CoPS	-	-	-	-	Yes	-	-	-	-	-	-	-	-	-	-	-	-	-	-	-	-	-	-	-	0
B (B3)	29	NC_007061.1	aureus	CoPS	-	Yes	-	-	-	-	-	-	-	-	-	-	-	-	-	-	-	-	-	-	-	-	-	-	0
B (B3)	ROSA	NC_007058.1	aureus	CoPS	-	-	-	Yes	-	CP022682	310185-310202	ATACAAGGATGGGATTAA	2 - lipase (geh)	CGP84_00258	-	-	-	-	-	-	-	-	-	-	-	-	-	-	0
B (B4)	IME1365_01	KY653129.1	haemolyticus	CoNS	Yes	-	-	-	-	CP025396	1810743-1810757	CCTCCCAGGACGCTA	3 - tRNA-Arg	CYD28_08750	-	-	-	-	-	-	-	-	-	-	-	-	-	-	0
B (B4)	37	NC_007056.1	aureus	CoPS	Yes	-	-	-	-	-	-	-	-	-	-	-	-	-	-	-	-	-	-	-	-	-	-	-	0
B (B4)	EW	NC_007055.1	aureus	CoPS	Yes	-	-	-	-	-	-	-	-	-	-	-	-	-	-	-	-	-	-	-	-	-	-	-	0
B (B4)	vB_SepiS-phiIPLA5	NC_018281.1	epidermidis	CoNS	Yes	-	-	-	-	-	-	-	-	-	-	-	-	-	-	-	-	-	-	-	-	-	-	-	0
B (B4)	CNPH82	NC_008722.1	epidermidis	CoNS	-	-	-	-	Yes	-	-	-	-	-	-	-	-	-	-	-	-	-	-	-	-	-	-	-	0
B (B4)	CNPx	NC_031241.1	epidermidis	CoNS	-	-	-	-	Yes	-	-	-	-	-	-	-	-	-	-	-	-	-	-	-	-	-	-	-	0
B (B4)	PH15	NC_008723.1	epidermidis	CoNS	-	-	-	-	Yes	-	-	-	-	-	-	-	-	-	-	-	-	-	-	-	-	-	-	-	0
B (B4)	vB_SepiS-phiIPLA7	NC_018284.1	epidermidis	CoNS	-	-	-	-	Yes	-	-	-	-	-	-	-	-	-	-	-	-	-	-	-	-	-	-	-	0
B (B4)	IME1348_01	KY653120.1	epidermidis	CoNS	-	-	-	-	Yes	-	-	-	-	-	-	-	-	-	-	-	-	-	-	-	-	-	-	-	0
B (B5)	42E	NC_007052.1	aureus	CoPS	Yes	-	-	-	-	CP022682	2040995-2041023	TGTATCCAAACTGGAGACTTTTAACATAA	4 - β-hemolysin (hlb)	CGP84_01911	Yes	Yes	-	-	-	-	-	-	-	-	-	-	-	-	2
B (B5)	phiSLT	NC_002661.2	aureus	CoPS	-	-	-	Yes	-	-	-	-	-	-	-	-	Yes	-	-	-	-	-	-	-	Yes	-	-	-	2
B (B5)	Phi12	NC_004616.1	aureus	CoPS	-	-	-	Yes	-	-	-	-	-	-	-	-	-	-	-	-	-	-	-	-	-	-	-	-	0
B (B5)	YMC/09/04/R1988	NC_022758.1	aureus	CoPS	-	-	-	Yes	-	-	-	-	-	-	-	-	-	-	Yes	Yes	-	-	-	-	-	-	-	-	2
B (B5)	StauST398-2	NC_021323.1	aureus	CoPS	-	-	-	Yes	-	-	-	-	-	-	-	-	-	-	-	Yes	-	-	-	-	-	-	-	-	1
B (B5)	tp310-2	NC_009762.3	aureus	CoPS	-	-	-	Yes	-	CP022682	310156-310202	GAAGAGGTATCTGGCAAGTTAAACCAATCATACAAGGATGGGATTAA	2 - lipase (geh)	CGP84_00258	-	-	-	-	-	Yes	-	-	-	-	-	-	-	-	1
B (B5)	3A	NC_007053.1	aureus	CoPS	-	-	-	-	-	-	-	-	-	-	-	-	-	-	-	Yes	-	-	-	-	Yes	-	-	-	2
B (B5)	47	NC_007054.1	aureus	CoPS	-	-	-	Yes	-	-	-	-	-	-	-	-	-	-	-	Yes	-	-	-	-	-	-	-	-	1
B (B5)	LH1	JX174275.1	aureus	CoPS	-	-	-	Yes	-	-	-	-	-	-	-	-	Yes	-	-	Yes	-	-	-	-	Yes	-	-	-	3
B (B5)	phi2958PVL	NC_011344.1	aureus	CoPS	-	-	-	Yes	-	-	-	-	-	-	-	-	Yes	-	-	Yes	-	-	-	-	Yes	-	-	-	3
B (B5)	phiSa2wa_st1	MF580410.1	aureus	CoPS	-	-	-	Yes	-	-	-	-	-	-	-	-	Yes	-	-	Yes	-	-	-	-	Yes	-	-	-	3
B (B5)	P240	KY056620.1	aureus	CoPS	-	-	-	Yes	-	-	-	-	-	-	-	-	Yes	-	-	Yes	-	-	-	-	Yes	-	-	-	3
B (B5)	phiSauS-IPLA35	NC_011612.1	aureus	CoPS	-	-	-	Yes	-	-	-	-	-	-	-	-	-	-	-	Yes	-	-	-	-	-	-	-	-	1
B (B5)	vB_SauS_phi2	NC_028862.1	aureus	CoPS	Yes	-	-	-	-	-	-	-	-	-	-	-	-	-	-	Yes	-	-	-	-	-	-	-	-	1
B (B5)	phi7401PVL	NC_020199.1	aureus	CoPS	-	-	-	Yes	-	-	-	-	-	-	-	-	Yes	-	-	Yes	-	-	-	-	Yes	-	-	-	3
B (B5)	SMSAP5	NC_019513.1	aureus	CoPS	-	-	-	Yes	-	-	-	-	-	-	-	-	-	-	-	Yes	-	-	-	-	-	-	-	-	1
B (B5)	SH-St 15644	MH384261.1	aureus	CoPS	-	-	-	Yes	-	-	-	-	-	-	-	-	-	-	-	Yes	-	-	-	-	-	-	-	-	1
B (B5)	SA137ruMSSAST121PVL	MG770897.1	aureus	CoPS	-	-	-	Yes	-	-	-	-	-	-	-	-	Yes	-	-	Yes	-	-	-	-	Yes	-	-	-	3
B (B5)	phiSa2wa_st5	MG029509.1	aureus	CoPS	-	-	-	Yes	-	-	-	-	-	-	-	-	Yes	-	-	-	-	-	-	-	Yes	-	-	-	2
B (B5)	phiSa2wa_st30	MG029511.1	aureus	CoPS	-	-	-	Yes	-	-	-	-	-	-	-	-	Yes	-	-	Yes	-	-	-	-	Yes	-	-	-	3
B (B5)	phiSa2wa_st72	MG029513.1	aureus	CoPS	-	-	-	Yes	-	-	-	-	-	-	-	-	Yes	-	-	Yes	-	-	-	-	Yes	-	-	-	3
B (B5)	phiSa2wa_st78	MG029514.1	aureus	CoPS	-	-	-	Yes	-	-	-	-	-	-	-	-	Yes	-	-	Yes	-	-	-	-	Yes	-	-	-	3
B (B5)	phiSa2wa_st80	MG029515.1	aureus	CoPS	-	-	-	Yes	-	-	-	-	-	-	-	-	Yes	-	-	Yes	-	-	-	-	Yes	-	-	-	3
B (B5)	phiSa2wa_st93mssa	MG029516.1	aureus	CoPS	-	-	-	Yes	-	-	-	-	-	-	-	-	Yes	-	-	Yes	-	-	-	-	Yes	-	-	-	3
B (B5)	phiSa2wa_st121mssa	MG029518.1	aureus	CoPS	-	-	-	Yes	-	-	-	-	-	-	-	-	Yes	-	-	Yes	-	-	-	-	Yes	-	-	-	3
B (B5)	phiSa2wa_st93	MG029517.1	aureus	CoPS	-	-	-	Yes	-	-	-	-	-	-	-	-	Yes	-	-	Yes	-	-	-	-	Yes	-	-	-	3
B (B6)	P954	NC_013195.1	aureus	CoPS	-	-	-	-	Yes	-	-	-	-	-	-	Yes	-	-	-	-	-	-	Yes	-	-	-	-	-	2
B (B6)	77	NC_005356.1	aureus	CoPS	-	-	-	Yes	-	-	-	-	-	-	-	-	-	-	-	-	-	-	Yes	-	-	-	-	-	1
B (B6)	phiSa119	NC_025460.1	aureus	CoPS	-	-	-	Yes	-	-	-	-	-	-	-	Yes	Yes	-	-	-	-	-	-	-	Yes	Yes	-	-	4
B (B6)	P1105	KT878766.1	aureus	CoPS	-	-	-	Yes	-		-	-	-	-	-	Yes	Yes	-	-	-	-	-	-	-	Yes	Yes	-	-	4
B (B6)	P282	KT809368.1	aureus	CoPS	Yes	-	-	-	-	-	-	-	-	-	-	-	-	Yes	-	-	-	Yes	Yes	-	-	-	Yes	-	4
B (B6)	StauST398-4	NC_023499.1	aureus	CoPS	Yes	-	-	-	-	-	-	-	-	-	-	-	-	Yes	-	-	Yes	-	-	-	-	-	Yes	-	3
B (B6)	phiNM3	NC_008617.1	aureus	CoPS	Yes	-	-	-	-	CP022682	2040995-2041023	TGTATCCAAACTGGAGACTTTTAACATAA	4 - β-hemolysin (hlb)	CGP84_01911	-	-	-	Yes	-	-	-	Yes	-	-	-	Yes	Yes	-	4
B (B6)	23MRA	NC_028775.1	aureus	CoPS	Yes	-	-	-	-	-	-	-	-	-	-	-	-	Yes	-	-	-	Yes	Yes	-	-	-	Yes	-	4
B (B6)	phiN315	NC_004740.1	aureus	CoPS	Yes	-	-	-	-	-	-	-	-	-	-	Yes	-	Yes	-	-	-	Yes	-	-	-	Yes	Yes	-	5
B (B6)	IME1361_01	KY653123.1	aureus	CoPS	Yes	-	-	-	-	CP022682	2040995-2041023	TGTATCCAAACTGGAGACTTTTAACATAA	4 - β-hemolysin (hlb)	CGP84_01911	-	-	-	Yes	-	-	-	Yes	Yes	-	-	-	Yes	-	4
B (B6)	phiBU01	NC_026016.1	aureus	CoPS	Yes	-	-	-	-	-	-	-	-	-	-	-	-	Yes	-	-	-	Yes	-	-	-	Yes	Yes	-	4
B (B6)	phi5967PVL	NC_019921.1	aureus	CoPS	-	-	-	Yes	-	-	-	-	-	-	-	-	Yes	-	-	-	-	-	-	-	Yes	-	-	-	2
B (B6)	phi7247PVL	AP011956.1	aureus	CoPS	-	-	-	Yes	-	-	-	-	-	-	-	-	Yes	-	-	-	-	-	-	-	Yes	-	-	-	2
B (B6)	SA1014ruMSSAST7	MH384259.1	aureus	CoPS	Yes	-	-	-	-	LS483365	2083255-2086269	ATGTATCCAAACTGGG	4 - β-hemolysin (hlb)	NCTC8325_02048	-	-	-	Yes	-	-	-	Yes	Yes	-	-	Yes	-	-	4
B (B6)	phiSa2wa_st22	MG029510.1	aureus	CoPS	-	-	-	Yes	-	-	-	-	-	-	-	-	Yes	-	-	-	-	-	-	-	Yes	-	-	-	2
B (B6)	phiSa2wa_st59	MG029512.1	aureus	CoPS	-	-	-	Yes	-	-	-	-	-	-	-	-	Yes	-	-	-	-	-	-	-	Yes	-	-	-	2
B (B6)	P630	KT809369.1	aureus	CoPS	-	-	-	Yes	-	-	-	-	-	-	-	Yes	-	-	-	-	-	-	-	-	-	Yes	-	-	2
B (B6)	SA345ruMSSAST8	MH401416.1	aureus	CoPS	Yes	-	-	-	-	LS483365	2083255-2086269	ATGTATCCAAACTGGG	4 - β-hemolysin (hlb)	NCTC8325_02048	-	Yes	-	Yes	-	-	-	Yes	Yes	-	-	-	-	-	4
B (B7)	JS01	NC_021773.2	aureus	CoPS	Yes	-	-	-	-	-	-	-	-	-	-	Yes	-	Yes	-	-	-	Yes	-	-	-	-	-	-	3
B (B7)	tp310-1	NC_009761.3	aureus	CoPS	-	-	-	Yes	-	-	-	-	-	-	-	-	Yes	-	-	-	-	-	-	-	Yes	-	-	-	2
B (B7)	phiPVL108	NC_008689.1	aureus	CoPS	-	-	-	Yes	-	-	-	-	-	-	-	-	Yes	-	-	-	-	-	-	-	Yes	-	-	-	2
B (B7)	phiPVL-CN125	NC_012784.1	aureus	CoPS	-	-	-	Yes	-	-	-	-	-	-	-	-	Yes	-	-	-	-	-	-	-	Yes	-	-	-	2
B (B7)	tp310-3	NC_009763.3	aureus	CoPS	Yes	-	-	-	-	-	-	-	-	-	-	-	-	Yes	-	-	-	Yes	-	-	-	-	Yes	-	3
B (B7)	phi13	NC_004617.1	aureus	CoPS	Yes	-	-	-	-	CP022682	2040995-2041023	TGTATCCAAACTGGAGACTTTTAACATAA	4 - β-hemolysin (hlb)	CGP84_01911	-	-	-	Yes	-	-	-	Yes	-	-	-	-	-	-	2
B (B7)	phiPV83	NC_002486.1	aureus	CoPS	-	Yes	-	-	-	-	-	-	-	-	-	-	Yes	-	-	-	-	-	-	-	Yes	-	-	-	2
B (B7)	SA780ruMSSAST101	MH384260.1	aureus	CoPS	Yes	-	-	-	-	LS483365	2083255-2086269	ATGTATCCAAACTGGG	4 - β-hemolysin (hlb)	NCTC8325_02048	-	Yes	-	Yes	-	-	-	Yes	-	-	-	-	-	-	3
B (B7)	SA537ruMSSAST97	MH401415.1	aureus	CoPS	Yes	-	-	-	-	LS483365	2083255-2086269	ATGTATCCAAACTGGG	4 - β-hemolysin (hlb)	NCTC8325_02048	-	Yes	-	Yes	-	-	-	Yes	-	-	-	-	-	-	3
B (B7)	IME1346_01	KY653125.1	aureus	CoPS	Yes	-	-	-	-	CP022903	1861922-1861940	ATGTATCCAAACTGGGGAC	4 - β-hemolysin (hlb)	CGQ01_01783	-	Yes	-	Yes	-	-	-	Yes	-	-	-	-	Yes	-	4
B (B7)	3 AJ-2017	KX232515.1	aureus	CoPS	Yes	-	-	-	-	-	-	-	-	-	-	Yes	-	Yes	-	-	-	Yes	-	-	-	-	Yes	Yes	5
B (B7)	PVL	NC_002321.1	aureus	CoPS	-	-	-	Yes	-	-	-	-	-	-	-	-	Yes	-	-	-	-	-	-	-	Yes	-	-	-	2
B (B8)	phi575	KY389063.1	sciuri	CoNS	-	-	Yes	-	-	-	-	-	-	-	-	-	-	-	-	-	-	Yes	-	-	-	-	-	-	1
B (B8)	phi879	KY389064.1	sciuri	CoNS	Yes	-	-	-	-	CP022046	1549967-1549983	GAATCCCTCCCAGGACG	3 - tRNA-Arg	CEP64_07725	-	-	-	-	-	-	-	-	-	-	-	-	-	-	0
B (B9)	IME1367_01	KY653124.1	warneri	CoNS	Yes	-	-	-	-	CP003668	1669092-1669110	AATCCCTCCCAGGACGCTA	3 - tRNA-Arg	A284_t11876	-	-	-	-	-	-	-	-	-	-	-	-	-	-	0
B (B9)	IME-SA4	NC_029025.1	haemolyticus	CoNS	Yes	-	-	-	-	-	-	-	-	-	-	-	-	-	-	-	-	-	-	-	-	-	-	-	0
B (B10)	StB12	NC_020490.2	hominis	CoNS	-	-	-	-	Yes	-	-	-	-	-	-	-	-	-	-	-	-	-	-	-	-	-	-	-	0
B (B10)	IME1318_01	KY653116.1	haemolyticus	CoNS	Yes	-	-	-	-	-	-	-	-	-	-	-	-	-	-	-	-	-	-	-	-	-	-	-	0
B (B10)	IME1323_01	KY653117.1	capitis	CoNS	Yes	-	-	-	-	CP023966	1706928-1706943	AATCCCTCCGTTTCCG	5 - tRNA-Ser	CRN29_08270	-	-	-	-	-	-	-	-	-	-	-	-	-	-	0
B (B11)	StB27	NC_019914.1	hominis	CoNS	-	-	-	-	Yes	-	-	-	-	-	-	-	-	-	-	-	-	-	Yes	-	-	-	-	-	1
B (B12)	SpT99F3	KX827371.1	pseudintermedius	CoPS	Yes	-	-	-	-	-	-	-	-	-	-	-	-	-	-	-	-	-	-	-	-	-	-	-	0
B (B13)	StB20	NC_019915.1	capitis	CoNS	-	-	-	-	Yes	-	-	-	-	-	-	-	-	-	-	-	-	-	-	-	-	-	-	-	0
B (B13)	StB20-like	NC_028821.1	epidermidis	CoNS	-	-	-	-	-	-	-	-	-	-	-	-	-	-	-	-	-	-	-	-	-	-	-	-	0
B (B14)	phiRS7	NC_022914.1	saprophyticus	CoNS	Yes	-	-	-	-	-	-	-	-	-	-	-	-	-	-	-	-	-	-	-	-	-	-	-	0
B (B15)	2638A	NC_007051.1	aureus	CoPS	Yes	-	-	-	-	CP032682	2717566-2717580	TTCCTCTCGAGGGGG	3 - tRNA-Arg	D8L98_13150	-	-	-	-	-	Yes	-	-	-	-	-	-	-	-	1
B (B16)	IME1354_01	KY653126.1	sp.	-	Yes	-	-	-	-	CP003668	1013044-1013056	CCCTCACTCTCCG	5 - tRNA-Ser	A284_t11874	-	-	-	-	-	-	-	-	-	-	-	-	-	-	0
B (B17)	vB_SauS_IMEP5	KX156762.1	aureus	CoPS	Yes	-	-	-	-	-	-	-	-	-	-	-	-	-	-	-	-	-	-	-	-	-	-	-	0
					38	27	1	40	25						1	12	26	17	10	23	1	16	8	5	27	7	10	1	164	Total of genes

## Sheet: Folha3
Cluster (subcluster)	Phage Name	Host				B1	B2	B3	B4	B5	B6	B7	B8	B9	B10	B11	B12	B13	B14	B15	B16	B17	D	Singleton
B (B1)	SpT252	pseudintermedius	0			SpT252	187	DW2	IME1365_01	42E	P954	JS01	phi575	IME1367_01	StB12	StB27	SpT99F3	StB20	phiRS7	2638A	IME1354_01	vB_SauS_IMEP5	6ec	SPbeta-like
B (B1)	SN13	pseudintermedius	0			SN13	TEM126	StauST398-3	37	phiSLT	77	tp310-1	phi879	IME-SA4	IME1318_01			StB20-like					vB_SepS_SEP9
B (B1)	SN11	pseudintermedius	0			SN11	phiSauS-IPLA88	96	EW	Phi12	phiSa119	phiPVL108			IME1323_01								vB_StaM_SA2
B (B1)	SN10	pseudintermedius	0			SN10	TEM123	phiJB	vB_SepiS-phiIPLA5	YMC/09/04/R1988	P1105	phiPVL-CN125
B (B1)	SN8	pseudintermedius	0			SN8	SA12	phiNM4	CNPH82	StauST398-2	P282	tp310-3
B (B1)	SpT5	pseudintermedius	0			SpT5	SP6	B166	CNPx	tp310-2	StauST398-4	phi13
B (B1)	SpT152	pseudintermedius	0			SpT152	SP5	phiETA3	PH15	3A	phiNM3	phiPV83
B (B2)	187	aureus	0	1.27344			phiNM1	3MRA	vB_SepiS-phiIPLA7	47	23MRA	SA780ruMSSAST101
B (B2)	TEM126	aureus	0				phiNM2	phiMR11	IME1348_01	LH1	phiN315	SA537ruMSSAST97
B (B2)	phiSauS-IPLA88	aureus	0				80alpha	80		phi2958PVL	IME1361_01	IME1346_01
B (B2)	TEM123	aureus	0				53	52A		phiSa2wa_st1	phiBU01	3 AJ-2017
B (B2)	SA12	aureus	1				85	StauST398-1		P240	phi5967PVL	PVL
B (B2)	SP6	aureus	1				phiMR25	StauST398-5		phiSauS-IPLA35	phi7247PVL
B (B2)	SP5	aureus	1				SA97	55		vB_SauS_phi2	SA1014ruMSSAST7
B (B2)	phiNM1	aureus	0				phiETA2	55-3		phi7401PVL	phiSa2wa_st22
B (B2)	phiNM2	aureus	0				69	55-2		SMSAP5	phiSa2wa_st59
B (B2)	80alpha	aureus	0				Sap26	88		SH-St 15644	P630
B (B2)	53	aureus	0				Lorac	UPMK_2		SA137ruMSSAST121PVL	SA345ruMSSAST8
B (B2)	85	aureus	1				11	92		phiSa2wa_st5
B (B2)	phiMR25	aureus	1					SA13		phiSa2wa_st30
B (B2)	SA97	aureus	0					71		phiSa2wa_st72
B (B2)	phiETA2	aureus	1					phiETA		phiSa2wa_st78
B (B2)	69	aureus	0					B236		phiSa2wa_st80
B (B2)	Sap26	aureus	0					X2		phiSa2wa_st93mssa
B (B2)	Lorac	aureus	0					29		phiSa2wa_st121mssa
B (B2)	11	aureus	0					ROSA		phiSa2wa_st93
B (B3)	DW2	aureus	0
B (B3)	StauST398-3	aureus	0
B (B3)	96	aureus	0
B (B3)	phiJB	aureus	0
B (B3)	phiNM4	aureus	0
B (B3)	B166	aureus	1
B (B3)	phiETA3	aureus	1
B (B3)	3MRA	aureus	0
B (B3)	phiMR11	aureus	0
B (B3)	80	aureus	0
B (B3)	52A	aureus	0
B (B3)	StauST398-1	aureus	1
B (B3)	StauST398-5	aureus	0
B (B3)	55	aureus	0
B (B3)	55-3	aureus	0
B (B3)	55-2	aureus	0
B (B3)	88	aureus	0
B (B3)	UPMK_2	aureus	1
B (B3)	92	aureus	1
B (B3)	SA13	aureus	1
B (B3)	71	aureus	0
B (B3)	phiETA	aureus	1
B (B3)	B236	aureus	2
B (B3)	X2	aureus	0
B (B3)	29	aureus	0
B (B3)	ROSA	aureus	0
B (B4)	IME1365_01	haemolyticus	0
B (B4)	37	aureus	0
B (B4)	EW	aureus	0
B (B4)	vB_SepiS-phiIPLA5	epidermidis	0
B (B4)	CNPH82	epidermidis	0	1.19853
B (B4)	CNPx	epidermidis	0
B (B4)	PH15	epidermidis	0
B (B4)	vB_SepiS-phiIPLA7	epidermidis	0
B (B4)	IME1348_01	epidermidis	0
B (B5)	42E	aureus	2
B (B5)	phiSLT	aureus	2
B (B5)	Phi12	aureus	0
B (B5)	YMC/09/04/R1988	aureus	2
B (B5)	StauST398-2	aureus	1
B (B5)	tp310-2	aureus	1
B (B5)	3A	aureus	2
B (B5)	47	aureus	1
B (B5)	LH1	aureus	3
B (B5)	phi2958PVL	aureus	3
B (B5)	phiSa2wa_st1	aureus	3
B (B5)	P240	aureus	3
B (B5)	phiSauS-IPLA35	aureus	1
B (B5)	vB_SauS_phi2	aureus	1
B (B5)	phi7401PVL	aureus	3
B (B5)	SMSAP5	aureus	1
B (B5)	SH-St 15644	aureus	1
B (B5)	SA137ruMSSAST121PVL	aureus	3
B (B5)	phiSa2wa_st5	aureus	2
B (B5)	phiSa2wa_st30	aureus	3
B (B5)	phiSa2wa_st72	aureus	3
B (B5)	phiSa2wa_st78	aureus	3
B (B5)	phiSa2wa_st80	aureus	3
B (B5)	phiSa2wa_st93mssa	aureus	3
B (B5)	phiSa2wa_st121mssa	aureus	3
B (B5)	phiSa2wa_st93	aureus	3
B (B6)	P954	aureus	2
B (B6)	77	aureus	1
B (B6)	phiSa119	aureus	4
B (B6)	P1105	aureus	4
B (B6)	P282	aureus	4
B (B6)	StauST398-4	aureus	3
B (B6)	phiNM3	aureus	4
B (B6)	23MRA	aureus	4
B (B6)	phiN315	aureus	5
B (B6)	IME1361_01	aureus	4
B (B6)	phiBU01	aureus	4
B (B6)	phi5967PVL	aureus	2
B (B6)	phi7247PVL	aureus	2
B (B6)	SA1014ruMSSAST7	aureus	4
B (B6)	phiSa2wa_st22	aureus	2
B (B6)	phiSa2wa_st59	aureus	2
B (B6)	P630	aureus	2
B (B6)	SA345ruMSSAST8	aureus	4
B (B7)	JS01	aureus	3
B (B7)	tp310-1	aureus	2
B (B7)	phiPVL108	aureus	2
B (B7)	phiPVL-CN125	aureus	2
B (B7)	tp310-3	aureus	3
B (B7)	phi13	aureus	2
B (B7)	phiPV83	aureus	2
B (B7)	SA780ruMSSAST101	aureus	3
B (B7)	SA537ruMSSAST97	aureus	3
B (B7)	IME1346_01	aureus	4
B (B7)	3 AJ-2017	aureus	4
B (B7)	PVL	aureus	2
B (B8)	phi575	sciuri	1
B (B8)	phi879	sciuri	0
B (B9)	IME1367_01	warneri	0
B (B9)	IME-SA4	haemolyticus	0
B (B10)	StB12	hominis	0
B (B10)	IME1318_01	haemolyticus	0
B (B10)	IME1323_01	capitis	0
B (B11)	StB27	hominis	1
B (B12)	SpT99F3	pseudintermedius	0
B (B13)	StB20	capitis	0
B (B13)	StB20-like	epidermidis	0
B (B14)	phiRS7	saprophyticus	0
B (B15)	2638A	aureus	1
B (B16)	IME1354_01	spp.	0
B (B17)	vB_SauS_IMEP5	aureus	0
D (D1)	6ec	epidermidis	0
D (D1)	vB_SepS_SEP9	epidermidis	0
D (D2)	vB_StaM_SA2	aureus	0
Singleton	SPbeta-like	epidermidis	0

## Sheet: Folha2
				Int-Y
Cluster (subcluster)	Phage Name	Host	Coagolase-type	Pham 148	Pham 1661 (ex pham 116)	Pham 280 (ex Pham 440)	Pham 1656 (ex pham 1032)	Pham 415	Pham 139 (ex 1190)	Pham 1333 (pham 1424)	pham 288 (ex Pham 492)	Pham 1023 (ex pham 1239)
B (B1)	SpT252	pseudintermedius	CoPS	-	-	Yes	-	-	-	-	-	-	1
B (B1)	SN13	pseudintermedius	CoPS	-	-	Yes	-	-	-	-	-	-	1
B (B1)	SN11	pseudintermedius	CoPS	-	-	Yes	-	-	-	-	-	-	1
B (B1)	SN10	pseudintermedius	CoPS	-	-	Yes	-	-	-	-	-	-	1
B (B1)	SN8	pseudintermedius	CoPS	-	-	Yes	-	-	-	-	-	-	1
B (B1)	SpT5	pseudintermedius	CoPS	-	-	Yes	-	-	-	-	-	-	1
B (B1)	SpT152	pseudintermedius	CoPS	-	-	Yes	-	-	-	-	-	-	1
B (B2)	187	aureus	CoPS	-	-	Yes	-	-	-	-	-	-	1
B (B2)	TEM126	aureus	CoPS	Yes	-	-	-	-	-	-	Yes	-	2
B (B2)	phiSauS-IPLA88	aureus	CoPS	Yes	-	-	-	-	-	-	-	-	1
B (B2)	TEM123	aureus	CoPS	-	-	-	-	-	-	-	Yes	-	1
B (B2)	SA12	aureus	CoPS	-	-	-	-	-	-	-	Yes	-	1
B (B2)	SP6	aureus	CoPS	-	-	-	-	-	-	-	Yes	-	1
B (B2)	SP5	aureus	CoPS	-	-	-	-	-	-	-	Yes	-	1
B (B2)	phiNM1	aureus	CoPS	-	-	Yes	-	-	-	-	-	-	1
B (B2)	phiNM2	aureus	CoPS	-	-	-	-	-	-	-	Yes	-	1
B (B2)	80alpha	aureus	CoPS	-	-	-	-	-	-	-	Yes	-	1
B (B2)	53	aureus	CoPS	-	-	-	-	-	-	-	Yes	-	1
B (B2)	85	aureus	CoPS	-	-	-	-	-	-	-	Yes	-	1
B (B2)	phiMR25	aureus	CoPS	-	-	Yes	-	-	-	-	-	-	1
B (B2)	SA97	aureus	CoPS	-	-	Yes	-	-	-	-	-	-	1
B (B2)	phiETA2	aureus	CoPS	-	-	Yes	-	-	-	-	-	-	1
B (B2)	69	aureus	CoPS	-	-	Yes	-	-	-	-	-	-	1
B (B2)	Sap26	aureus	CoPS	-	-	Yes	-	-	-	-	-	-	1
B (B2)	Lorac	aureus	CoPS	-	-	-	-	-	-	-	Yes	-	1
B (B2)	11	aureus	CoPS	-	-	Yes	-	-	-	-	-	-	1
B (B3)	DW2	aureus	CoPS	-	-	-	-	-	-	-	Yes	-	1
B (B3)	StauST398-3	aureus	CoPS	Yes	-	-	-	-	-	-	-	-	1
B (B3)	96	aureus	CoPS	Yes	-	-	-	-	-	-	-	-	1
B (B3)	phiJB	aureus	CoPS	-	Yes	-	-	-	-	-	-	-	1
B (B3)	phiNM4	aureus	CoPS	-	Yes	-	-	-	-	-	-	-	1
B (B3)	B166	aureus	CoPS	-	-	Yes	-	-	-	-	-	-	1
B (B3)	phiETA3	aureus	CoPS	-	-	Yes	-	-	-	-	-	-	1
B (B3)	3MRA	aureus	CoPS	-	-	Yes	-	-	-	-	-	-	1
B (B3)	phiMR11	aureus	CoPS	-	-	-	-	-	-	-	Yes	-	1
B (B3)	80	aureus	CoPS	-	Yes	-	-	-	-	-	-	-	1
B (B3)	52A	aureus	CoPS	-	Yes	-	-	-	-	-	-	-	1
B (B3)	StauST398-1	aureus	CoPS	Yes	-	-	-	-	-	-	-	-	1
B (B3)	StauST398-5	aureus	CoPS	Yes	-	-	-	-	-	-	-	-	1
B (B3)	55	aureus	CoPS	-	-	Yes	-	-	-	-	-	-	1
B (B3)	55-3	aureus	CoPS	-	-	Yes	-	-	-	-	-	-	1
B (B3)	55-2	aureus	CoPS	-	-	Yes	-	-	-	-	-	-	1
B (B3)	88	aureus	CoPS	-	-	Yes	-	-	-	-	-	-	1
B (B3)	UPMK_2	aureus	CoPS	-	-	-	-	-	-	-	Yes	-	1
B (B3)	92	aureus	CoPS	-	-	-	-	-	-	-	Yes	-	1
B (B3)	SA13	aureus	CoPS	-	-	-	-	-	-	-	Yes	-	1
B (B3)	71	aureus	CoPS	-	-	Yes	-	-	-	-	-	-	1
B (B3)	phiETA	aureus	CoPS	-	-	Yes	-	-	-	-	-	-	1
B (B3)	B236	aureus	CoPS	-	-	Yes	-	-	-	-	-	-	1
B (B3)	X2	aureus	CoPS	-	-	-	-	-	-	-	Yes	-	1
B (B3)	29	aureus	CoPS	-	-	Yes	-	-	-	-	-	-	1
B (B3)	ROSA	aureus	CoPS	-	Yes	-	-	-	-	-	-	-	1
B (B4)	IME1365_01	haemolyticus	CoNS	Yes	-	-	-	-	-	-	-	-	1
B (B4)	37	aureus	CoPS	Yes	-	-	-	-	-	-	-	-	1
B (B4)	EW	aureus	CoPS	Yes	-	-	-	-	-	-	-	-	1
B (B4)	vB_SepiS-phiIPLA5	epidermidis	CoNS	Yes	-	-	-	-	-	-	-	-	1
B (B4)	CNPH82	epidermidis	CoNS	-	-	-	-	-	-	-	Yes	-	1
B (B4)	CNPx	epidermidis	CoNS	-	-	-	-	-	-	-	Yes	-	1
B (B4)	PH15	epidermidis	CoNS	-	-	-	-	-	-	-	Yes	-	1
B (B4)	vB_SepiS-phiIPLA7	epidermidis	CoNS	-	-	-	-	-	-	-	Yes	-	1
B (B4)	IME1348_01	epidermidis	CoNS	-	-	-	-	-	-	-	Yes	-	1
B (B5)	42E	aureus	CoPS	Yes	-	-	-	-	-	-	-	-	1
B (B5)	phiSLT	aureus	CoPS	-	Yes	-	-	-	-	-	-	-	1
B (B5)	Phi12	aureus	CoPS	-	Yes	-	-	-	-	-	-	-	1
B (B5)	YMC/09/04/R1988	aureus	CoPS	-	Yes	-	-	-	-	-	-	-	1
B (B5)	StauST398-2	aureus	CoPS	-	Yes	-	-	-	-	-	-	-	1
B (B5)	tp310-2	aureus	CoPS	-	Yes	-	-	-	-	-	-	-	1
B (B5)	3A	aureus	CoPS	-	-	-	-	-	-	-	-	-	0
B (B5)	47	aureus	CoPS	-	Yes	-	-	-	-	-	-	-	1
B (B5)	LH1	aureus	CoPS	-	Yes	-	-	-	-	-	-	-	1
B (B5)	phi2958PVL	aureus	CoPS	-	Yes	-	-	-	-	-	-	-	1
B (B5)	phiSa2wa_st1	aureus	CoPS	-	Yes	-	-	-	-	-	-	-	1
B (B5)	P240	aureus	CoPS	-	Yes	-	-	-	-	-	-	-	1
B (B5)	phiSauS-IPLA35	aureus	CoPS	-	Yes	-	-	-	-	-	-	-	1
B (B5)	vB_SauS_phi2	aureus	CoPS	Yes	-	-	-	-	-	-	-	-	1
B (B5)	phi7401PVL	aureus	CoPS	-	Yes	-	-	-	-	-	-	-	1
B (B5)	SMSAP5	aureus	CoPS	-	Yes	-	-	-	-	-	-	-	1
B (B5)	SH-St 15644	aureus	CoPS	-	Yes	-		-	-	-	-	-	1
B (B5)	SA137ruMSSAST121PVL	aureus	CoPS	-	Yes	-		-	-	-	-	-	1
B (B5)	phiSa2wa_st5	aureus	CoPS	-	Yes	-		-	-	-	-	-	1
B (B5)	phiSa2wa_st30	aureus	CoPS	-	Yes	-		-	-	-	-	-	1
B (B5)	phiSa2wa_st72	aureus	CoPS	-	Yes	-		-	-	-	-	-	1
B (B5)	phiSa2wa_st78	aureus	CoPS	-	Yes	-		-	-	-	-	-	1
B (B5)	phiSa2wa_st80	aureus	CoPS	-	Yes	-		-	-	-	-	-	1
B (B5)	phiSa2wa_st93mssa	aureus	CoPS	-	Yes	-		-	-	-	-	-	1
B (B5)	phiSa2wa_st121mssa	aureus	CoPS	-	Yes	-		-	-	-	-	-	1
B (B5)	phiSa2wa_st93	aureus	CoPS	-	Yes	-		-	-	-	-	-	1
B (B6)	P954	aureus	CoPS	-	-	-	-	-	-	-	Yes	-	1
B (B6)	77	aureus	CoPS	-	Yes	-	-	-	-	-	-	-	1
B (B6)	phiSa119	aureus	CoPS	-	Yes	-	-	-	-	-	-	-	1
B (B6)	P1105	aureus	CoPS	-	Yes	-	-	-	-	-	-	-	1
B (B6)	P282	aureus	CoPS	Yes	-	-	-	-	-	-	-	-	1
B (B6)	StauST398-4	aureus	CoPS	Yes	-	-	-	-	-	-	-	-	1
B (B6)	phiNM3	aureus	CoPS	Yes	-	-	-	-	-	-	-	-	1
B (B6)	23MRA	aureus	CoPS	Yes	-	-	-	-	-	-	-	-	1
B (B6)	phiN315	aureus	CoPS	Yes	-	-	-	-	-	-	-	-	1
B (B6)	IME1361_01	aureus	CoPS	Yes	-	-	-	-	-	-	-	-	1
B (B6)	phiBU01	aureus	CoPS	Yes	-	-	-	-	-	-	-	-	1
B (B6)	phi5967PVL	aureus	CoPS	-	Yes	-	-	-	-	-	-	-	1
B (B6)	phi7247PVL	aureus	CoPS	-	Yes	-	-	-	-	-	-	-	1
B (B6)	SA1014ruMSSAST7	aureus	CoPS	Yes	-	-		-	-	-	-	-	1
B (B6)	phiSa2wa_st22	aureus	CoPS	-	Yes	-		-	-	-	-	-	1
B (B6)	phiSa2wa_st59	aureus	CoPS	-	Yes	-		-	-	-	-	-	1
B (B6)	P630	aureus	CoPS	-	Yes	-		-	-	-	-	-	1
B (B6)	SA345ruMSSAST8	aureus	CoPS	Yes	-	-		-	-	-	-	-	1
B (B7)	JS01	aureus	CoPS	Yes	-	-	-	-	-	-	-	-	1
B (B7)	tp310-1	aureus	CoPS	-	Yes	-	-	-	-	-	-	-	1
B (B7)	phiPVL108	aureus	CoPS	-	Yes	-	-	-	-	-	-	-	1
B (B7)	phiPVL-CN125	aureus	CoPS	-	Yes	-	-	-	-	-	-	-	1
B (B7)	tp310-3	aureus	CoPS	Yes	-	-	-	-	-	-	-	-	1
B (B7)	phi13	aureus	CoPS	Yes	-	-	-	-	-	-	-	-	1
B (B7)	phiPV83	aureus	CoPS	-	-	Yes	-	-	-	-	-	-	1
B (B7)	SA780ruMSSAST101	aureus	CoPS	Yes	-	-	-	-	-	-	-	-	1
B (B7)	SA537ruMSSAST97	aureus	CoPS	Yes	-	-	-	-	-	-	-	-	1
B (B7)	IME1346_01	aureus	CoPS	Yes	-	-	-	-	-	-	-	-	1
B (B7)	3 AJ-2017	aureus	CoPS	Yes	-	-	-	-	-	-	-	-	1
B (B7)	PVL	aureus	CoPS	-	Yes	-	-	-	-	-	-	-	1
B (B8)	phi575	sciuri	CoNS	-	-	-	Yes	-	-	-	-	-	1
B (B8)	phi879	sciuri	CoNS	Yes	-	-	-	-	-	-	-	-	1
B (B9)	IME1367_01	warneri	CoNS	Yes	-	-	-	-	-	-	-	-	1
B (B9)	IME-SA4	haemolyticus	CoNS	Yes	-	-	-	-	-	-	-	-	1
B (B10)	StB12	hominis	CoNS	-	-	-	-	-	-	-	Yes	-	1
B (B10)	IME1318_01	haemolyticus	CoNS	Yes	-	-	-	-	-	-	-	-	1
B (B10)	IME1323_01	capitis	CoNS	Yes	-	-	-	-	-	-	-	-	1
B (B11)	StB27	hominis	CoNS	-	-	-	-	-	-	-	Yes	-	1
B (B12)	SpT99F3	pseudintermedius	CoPS	Yes	-	-	-	-	-	-	-	-	1
B (B13)	StB20	capitis	CoNS	-	-	-	-	-	-	-	Yes	-	1
B (B13)	StB20-like	epidermidis	CoNS	-	-	-	-	-	-	-	-	-	0
B (B14)	phiRS7	saprophyticus	CoNS	Yes	-	-	-	-	-	-	-	-	1
B (B15)	2638A	aureus	CoPS	Yes	-	-	-	-	-	-	-	-	1
B (B16)	IME1354_01	spp.	-	Yes	-	-	-	-	-	-	-	-	1
B (B17)	vB_SauS_IMEP5	aureus	CoPS	Yes	-	-	-	-	-	-	-	-	1
D (D1)	6ec	epidermidis	CoNS	-	-	-	-	-	-	Yes	-	-	1
D (D1)	vB_SepS_SEP9	epidermidis	CoNS	-	-	-	-	-	-	Yes	-	-	1
D (D2)	vB_StaM_SA2	aureus	CoPS	-	-	-	-	-	-	Yes	-		1
Singleton	SPbeta-like	epidermidis	CoNS	-	-	-	-	Yes	Yes	-	-	Yes	3

## Sheet: integrases, VDs  - more genes
														Integration sites				Virulence genes
					Int-Y													Stap_Strp_tox_C	Stk	chp	SCIN	toxin	VirE	VirE	VirE	Hol-Tox	Hol-Tox	PemK-like	lukS-PV	lukF-PV	MazF	MazF	toxin	EtA
	Cluster (subcluster)	Phage Name	Host	Coagolase-type	<	Pham 1661 (ex pham 116)	Pham 280 (ex Pham 440)	Pham 1656 (ex pham 1032)	Pham 415	Pham 139 (ex 1190)	Pham 1333 (pham 1424)	pham 288 (ex Pham 492)	Pham 1023 (ex pham 1239)	attP coordinates	Strain coordinates	attB	Locus	Pham 2064 (ex Pham 21)	Pham 1460 (ex Pham24)	Pham 2122 (ex Pham 25)	Pham 914 (Ex pham26)	Pham 1288	Pham 1270	Pham 297	Pham 547	Pham 529 (ex 367)	Pham 1322 (ex Pham 913)	Pham 1259 (ex Pham 549)	Pham 1939 (ex Pham 387)	Pham 555 (ex Pham 388)	Pham 1579 (ex Pham 797)	Pham 737	Pham 693	Pham 1903 (ex Pham 948)	Number of virulence genes/phage
	B (B1)	SpT252	pseudintermedius	CoPS	-	-	Yes	-	-	-	-	-	-	-	-	-	-	-	-	-	-	-	-	-	-	-	-	-	-	-	-	-	-	-	0
	B (B1)	SN13	pseudintermedius	CoPS	-	-	Yes	-	-	-	-	-	-	-	-	-	-	-	-	-	-	Yes	-	-	-	-	-	-	-	-	-	-	-	-	1
	B (B1)	SN11	pseudintermedius	CoPS	-	-	Yes	-	-	-	-	-	-	-	-	-	-	-	-	-	-	Yes	-	-	-	-	-	-	-	-	-	-	-	-	1
	B (B1)	SN10	pseudintermedius	CoPS	-	-	Yes	-	-	-	-	-	-	-	-	-	-	-	-	-	-	Yes	-	-	-	-	-	-	-	-	-	-	-	-	1
	B (B1)	SN8	pseudintermedius	CoPS	-	-	Yes	-	-	-	-	-	-	-	-	-	-	-	-	-	-	Yes	-	-	-	-	-	-	-	-	-	-	-	-	1
	B (B1)	SpT5	pseudintermedius	CoPS	-	-	Yes	-	-	-	-	-	-	-	-	-	-	-	-	-	-	-	-	-	-	-	-	-	-	-	-	-	-	-	0
	B (B1)	SpT152	pseudintermedius	CoPS	-	-	Yes	-	-	-	-	-	-	-	-	-	-	-	-	-	-	-	-	-	-	-	-	-	-	-	-	-	-	-	0
	B (B2)	187	aureus	CoPS	-	-	Yes	-	-	-	-	-	-	-	-	-	-	-	-	-	-	-	-	-	-	-	-	-	-	-	-	-	-	-	0
	B (B2)	TEM126	aureus	CoPS	Yes	-	-	-	-	-	-	Yes	-	-	-	-	-	-	-	-	-	-	-	-	-	-	-	-	-	-	-	-	-	-	0
	B (B2)	phiSauS-IPLA88	aureus	CoPS	Yes	-	-	-	-	-	-	-	-	-	-	-	-	-	-	-	-	-	-	-	-	-	-	-	-	-	-	-	-	-	0
	B (B2)	TEM123	aureus	CoPS	-	-	-	-	-	-	-	Yes	-	-	-	-	-	-	-	-	-	-	-	-	-	-	-	-	-	-	-	-	-	-	0
	B (B2)	SA12	aureus	CoPS	-	-	-	-	-	-	-	Yes	-	-	-	-	-	-	-	-	-	-	-	-	-	-	-	Yes	-	-	-	-	-	-	1
	B (B2)	SP6	aureus	CoPS	-	-	-	-	-	-	-	Yes	-	-	-	-	-	-	-	-	-	-	-	-	-	-	-	Yes	-	-	-	-	-	-	1
	B (B2)	SP5	aureus	CoPS	-	-	-	-	-	-	-	Yes	-	-	-	-	-	-	-	-	-	-	-	-	-	-	-	Yes	-	-	-	-	-	-	1
	B (B2)	phiNM1	aureus	CoPS	-	-	Yes	-	-	-	-	-	-	-	-	-	-	-	-	-	-	-	-	-	-	-	-	-	-	-	-	-	-	-	0
	B (B2)	phiNM2	aureus	CoPS	-	-	-	-	-	-	-	Yes	-	-	-	-	-	-	-	-	-	-	-	-	-	-	-	-	-	-	-	-	-	-	0
	B (B2)	80alpha	aureus	CoPS	-	-	-	-	-	-	-	Yes	-	-	-	-	-	-	-	-	-	-	-	-	-	-	-	-	-	-	-	-	-	-	0
	B (B2)	53	aureus	CoPS	-	-	-	-	-	-	-	Yes	-	-	-	-	-	-	-	-	-	-	-	-	-	-	-	-	-	-	-	-	-	-	0
	B (B2)	85	aureus	CoPS	-	-	-	-	-	-	-	Yes	-	-	-	-	-	-	-	-	-	Yes	-	-	-	-	-	Yes	-	-	-	-	-	-	2
	B (B2)	phiMR25	aureus	CoPS	-	-	Yes	-	-	-	-	-	-	-	-	-	-	-	-	-	-	Yes	-	-	-	-	-	Yes	-	-	-	-	-	-	2
	B (B2)	SA97	aureus	CoPS	-	-	Yes	-	-	-	-	-	-	-	-	-	-	-	-	-	-	-	-	-	-	-	-	-	-	-	-	-	-	-	0
	B (B2)	phiETA2	aureus	CoPS	-	-	Yes	-	-	-	-	-	-	-	-	-	-	-	-	-	-	-	-	-	-	-	-	-	-	-	-	-	-	Yes	1
	B (B2)	69	aureus	CoPS	-	-	Yes	-	-	-	-	-	-	-	-	-	-	-	-	-	-	-	-	-	-	-	-	-	-	-	-	-	-	-	0
	B (B2)	Sap26	aureus	CoPS	-	-	Yes	-	-	-	-	-	-	-	-	-	-	-	-	-	-	-	-	-	-	-	-	-	-	-	-	-	-	-	0
NEW	B (B2)	Lorac	aureus	CoPS	-	-	-	-	-	-	-	Yes	-						-	-	-	-	-	-	-	-	-	-	-	-	-	-	-	-	0
	B (B2)	11	aureus	CoPS	-	-	Yes	-	-	-	-	-	-	-	-	-	-	-	-	-	-	-	-	-	-	-	-	-	-	-	-	-	-	-	0
	B (B3)	DW2	aureus	CoPS	-	-	-	-	-	-	-	Yes	-	-	-	-	-	-	-	-	-	Yes	-	-	-	-	-	-	-	-	-	-	-	-	1
	B (B3)	StauST398-3	aureus	CoPS	Yes	-	-	-	-	-	-	-	-	1-17	2492628-2492645	2-tmRNA	C9J77_12980	-	-	-	-	Yes	-	-	-	-	-	-	-	-	-	-	-	-	1
	B (B3)	96	aureus	CoPS	Yes	-	-	-	-	-	-	-	-	-	-	-	-	-	-	-	-	Yes	-	-	-	-	-	-	-	-	-	-	-	-	1
	B (B3)	phiJB	aureus	CoPS	-	Yes	-	-	-	-	-	-	-	-	-	-	-	-	-	-	-	Yes	-	-	-	-	-	-	-	-	-	-	-	-	1
	B (B3)	phiNM4	aureus	CoPS	-	Yes	-	-	-	-	-	-	-	43172-43189	902211-902228	Lipase2	RK83_004495	-	-	-	-	Yes	-	-	-	-	-	-	-	-	-	-	-	-	1
	B (B3)	B166	aureus	CoPS	-	-	Yes	-	-	-	-	-	-	1-48	2634326-2634373	intergenic	-	-	-	-	-	-	-	-	-	-	-	-	-	-	-	-	-	Yes	1
	B (B3)	phiETA3	aureus	CoPS	-	-	Yes	-	-	-	-	-	-	-	-	-	-	-	-	-	-	-	-	-	-	-	-	-	-	-	-	-	-	Yes	1
	B (B3)	3MRA	aureus	CoPS	-	-	Yes	-	-	-	-	-	-	-	-	-	-	-	-	-	-	Yes	-	-	-	-	-	-	-	-	-	-	-	-	1
	B (B3)	phiMR11	aureus	CoPS	-	-	-	-	-	-	-	Yes	-	-	-	-	-	-	-	-	-	Yes	-	-	-	-	-	-	-	-	-	-	-	-	1
	B (B3)	80	aureus	CoPS	-	Yes	-	-	-	-	-	-	-	-	-	-	-	-	-	-	-	Yes	-	-	-	-	-	-	-	-	-	-	-	-	1
	B (B3)	52A	aureus	CoPS	-	Yes	-	-	-	-	-	-	-	-	-	-	-	-	-	-	-	Yes	-	-	-	-	-	-	-	-	-	-	-	-	1
	B (B3)	StauST398-1	aureus	CoPS	Yes	-	-	-	-	-	-	-	-	-	-	-	-	-	-	-	Yes	-	-	-	-	-	-	-	-	-	-	-	-	-	1
	B (B3)	StauST398-5	aureus	CoPS	Yes	-	-	-	-	-	-	-	-	-	-	-	-	-	-	-	-	Yes	-	-	-	-	-	-	-	-	-	-	-	-	1
	B (B3)	55	aureus	CoPS	-	-	Yes	-	-	-	-	-	-	-	-	-	-	-	-	-	-	Yes	-	-	-	-	-	-	-	-	-	-	-	-	1
	B (B3)	55-3	aureus	CoPS	-	-	Yes	-	-	-	-	-	-	-	-	-	-	-	-	-	-	Yes	-	-	-	-	-	-	-	-	-	-	-	-	1
	B (B3)	55-2	aureus	CoPS	-	-	Yes	-	-	-	-	-	-	-	-	-	-	-	-	-	-	Yes	-	-	-	-	-	-	-	-	-	-	-	-	1
	B (B3)	88	aureus	CoPS	-	-	Yes	-	-	-	-	-	-	-	-	-	-	-	-	-	-	Yes	-	-	-	-	-	-	-	-	-	-	-	-	1
	B (B3)	UPMK_2	aureus	CoPS	-	-	-	-	-	-	-	Yes	-	-	-	-	-	-	-	-	-	-	-	-	-	-	-	Yes	-	-	-	-	-	-	1
	B (B3)	92	aureus	CoPS	-	-	-	-	-	-	-	Yes	-	-	-	-	-	-	-	-	-	-	-	-	-	-	-	Yes	-	-	-	-	-	-	1
	B (B3)	SA13	aureus	CoPS	-	-	-	-	-	-	-	Yes	-	-	-	-	-	-	-	-	-	-	-	-	-	-	-	Yes	-	-	-	-	-	-	1
	B (B3)	71	aureus	CoPS	-	-	Yes	-	-	-	-	-	-	-	-	-	-	-	-	-	-	Yes	-	-	-	-	-	-	-	-	-	-	-	-	1
	B (B3)	phiETA	aureus	CoPS	-	-	Yes	-	-	-	-	-	-	430811-49	1364414 -1364462	sufB-intergenic	RK79_006565	-	-	-	-	-	-	-	-	-	-	-	-	-	-	-	-	Yes	1
	B (B3)	B236	aureus	CoPS	-	-	Yes	-	-	-	-	-	-	1-49	2457906-2457954	intergenic	-	-	-	-	-	-	-	-	-	-	-	Yes	-	-	-	-	-	Yes	2
	B (B3)	X2	aureus	CoPS	-	-	-	-	-	-	-	Yes	-	-	-	-	-	-	-	-	-	-	-	-	-	-	-	-	-	-	-	-	-	-	0
	B (B3)	29	aureus	CoPS	-	-	Yes	-	-	-	-	-	-	-	-	-	-	-	-	-	-	-	-	-	-	-	-	-	-	-	-	-	-	-	0
	B (B3)	ROSA	aureus	CoPS	-	Yes	-	-	-	-	-	-	-	-	-	-	-	-	-	-	-	Yes	-	-	-	-	-	-	-	-	-	-	-	-	1
	B (B4)	IME1365_01	haemolyticus	CoNS	Yes	-	-	-	-	-	-	-	-	1-23	1810740-1810762	tRNA-Arg	CYD28_08750	-	-	-	-	Yes	-	-	-	-	-	-	-	-	-	-	-	-	1
	B (B4)	37	aureus	CoPS	Yes	-	-	-	-	-	-	-	-	-	-	-	-	-	-	-	-	-	-	-	-	-	-	-	-	-	-	-	-	-	0
	B (B4)	EW	aureus	CoPS	Yes	-	-	-	-	-	-	-	-	-	-	-	-	-	-	-	-	-	-	-	-	-	-	-	-	-	-	-	Yes	-	1
	B (B4)	vB_SepiS-phiIPLA5	epidermidis	CoNS	Yes	-	-	-	-	-	-	-	-	-	-	-	-	-	-	-	-	-	-	-	-	-	-	-	-	-	-	-	-	-	0
	B (B4)	CNPH82	epidermidis	CoNS	-	-	-	-	-	-	-	Yes	-	-	-	-	-	-	-	-	-	Yes	-	-	-	-	-	-	-	-	-	-	-	-	1
	B (B4)	CNPx	epidermidis	CoNS	-	-	-	-	-	-	-	Yes	-	-	-	-	-	-	-	-	-	Yes	-	-	-	-	-	-	-	-	-	-	-	-	1
	B (B4)	PH15	epidermidis	CoNS	-	-	-	-	-	-	-	Yes	-	-	-	-	-	-	-	-	-	Yes	-	-	-	-	-	-	-	-	-	-	-	-	1
	B (B4)	vB_SepiS-phiIPLA7	epidermidis	CoNS	-	-	-	-	-	-	-	Yes	-	-	-	-	-	-	-	-	-	Yes	-	-	-	-	-	-	-	-	-	-	-	-	1
	B (B4)	IME1348_01	epidermidis	CoNS	-	-	-	-	-	-	-	Yes	-	-	-	-	-	-	-	-	-	Yes	-	-	-	-	-	-	-	-	-	-	-	-	1
	B (B5)	42E	aureus	CoPS	Yes	-	-	-	-	-	-	-	-	-	-	-	-	-	-	-	-	-	-	Yes	Yes	Yes	-	-	-	-	-	-	-	-	3
	B (B5)	phiSLT	aureus	CoPS	-	Yes	-	-	-	-	-	-	-	1-29	2233899-2233927	hypothetical protein	CSC50_2200	-	-	-	-	Yes	-	-	-	-	-	-	Yes	Yes	-	-	-	-	3
	B (B5)	Phi12	aureus	CoPS	-	Yes	-	-	-	-	-	-	-	-	-	-	-	-	-	-	-	-	-	-	-	-	-	-	-	-	-	-	-	-	0
	B (B5)	YMC/09/04/R1988	aureus	CoPS	-	Yes	-	-	-	-	-	-	-	-	-	-	-	-	-	-	-	-	Yes	-	-	-	-	Yes	-	-	-	-	-	-	2
	B (B5)	StauST398-2	aureus	CoPS	-	Yes	-	-	-	-	-	-	-	1-15	525362-525376	hypothetical protein	C9J90_02550	-	-	-	-	-	Yes	-	-	-	-	-	-	-	-	-	-	-	1
	B (B5)	tp310-2	aureus	CoPS	-	Yes	-	-	-	-	-	-	-	-	-	-	-	-	-	-	-	-	Yes	-	-	-	-	-	-	-	-	-	-	-	1
	B (B5)	3A	aureus	CoPS	-	-	-	-	-	-	-	-	-	-	-	-	-	-	-	-	-	-	Yes	-	-	-	-	-	Yes	-	-	-	-	-	2
	B (B5)	47	aureus	CoPS	-	Yes	-	-	-	-	-	-	-	-	-	-	-	-	-	-	-	-	Yes	-	-	-	-	-	-	-	-	-	-	-	1
	B (B5)	LH1	aureus	CoPS	-	Yes	-	-	-	-	-	-	-	-	-	-	-	-	-	-	-	-	Yes	-	-	-	-	-	Yes	Yes	-	-	-	-	3
	B (B5)	phi2958PVL	aureus	CoPS	-	Yes	-	-	-	-	-	-	-	-	-	-	-	-	-	-	-	-	Yes	-	-	-	-	-	Yes	Yes	-	-	-	-	3
	B (B5)	phiSa2wa_st1	aureus	CoPS	-	Yes	-	-	-	-	-	-	-	1-21	1584666-1584686	intergenic	-	-	-	-	-	Yes	Yes	-	-	-	-	-	Yes	Yes	-	-	-	-	4
	B (B5)	P240	aureus	CoPS	-	Yes	-	-	-	-	-	-	-	-	-	-	-	-	-	-	-	Yes	Yes	-	-	-	-	-	Yes	Yes	-	-	-	-	4
	B (B5)	phiSauS-IPLA35	aureus	CoPS	-	Yes	-	-	-	-	-	-	-	-	-	-	-	-	-	-	-	Yes	Yes	-	-	-	-	-	-	-	-	-	-	-	2
	B (B5)	vB_SauS_phi2	aureus	CoPS	Yes	-	-	-	-	-	-	-	-	-	-	-	-	-	-	-	-	Yes	Yes	-	-	-	-	-	-	-	-	-	-	-	2
	B (B5)	phi7401PVL	aureus	CoPS	-	Yes	-	-	-	-	-	-	-	-	-	-	-	-	-	-	-	Yes	Yes	-	-	-	-	-	Yes	Yes	-	-	-	-	4
	B (B5)	SMSAP5	aureus	CoPS	-	Yes	-	-	-	-	-	-	-	-	-	-	-	-	-	-	-	Yes	Yes	-	-	-	-	-	-	-	-	-	-	-	2
	B (B5)	SH-St 15644	aureus	CoPS	-	Yes	-		-	-	-	-	-					-	-	-	-	Yes	Yes	-	-	-	-		-	-	-	-	-	-	2
NEW	B (B5)	SA137ruMSSAST121PVL	aureus	CoPS	-	Yes	-		-	-	-	-	-					-	-	-	-	-	Yes	-	-	-	-		Yes	Yes	-	-	-	-	3
NEW	B (B5)	phiSa2wa_st5	aureus	CoPS	-	Yes	-		-	-	-	-	-					-	-	-	-	Yes	-	-	-	-	-		Yes	Yes	-	-	-	-	3
NEW	B (B5)	phiSa2wa_st30	aureus	CoPS	-	Yes	-		-	-	-	-	-					-	-	-	-	Yes	Yes	-	-	-	-		Yes	Yes	-	-	-	-	4
NEW	B (B5)	phiSa2wa_st72	aureus	CoPS	-	Yes	-		-	-	-	-	-					-	-	-	-	Yes	Yes	-	-	-	-		Yes	Yes	-	-	-	-	4
NEW	B (B5)	phiSa2wa_st78	aureus	CoPS	-	Yes	-		-	-	-	-	-					-	-	-	-	Yes	Yes	-	-	-	-		Yes	Yes	-	-	-	-	4
NEW	B (B5)	phiSa2wa_st80	aureus	CoPS	-	Yes	-		-	-	-	-	-					-	-	-	-	Yes	Yes	-	-	-	-		Yes	Yes	-	-	-	-	4
NEW	B (B5)	phiSa2wa_st93mssa	aureus	CoPS	-	Yes	-		-	-	-	-	-					-	-	-	-	Yes	Yes	-	-	-	-		Yes	Yes	-	-	-	-	4
NEW	B (B5)	phiSa2wa_st121mssa	aureus	CoPS	-	Yes	-		-	-	-	-	-					-	-	-	-	-	Yes	-	-	-	-		Yes	Yes	-	-	-	-	3
NEW	B (B5)	phiSa2wa_st93	aureus	CoPS	-	-	-		-	-	-	-	-					-	-	-	-	Yes	Yes	-	-	-	-		Yes	Yes	-	-	-	-	4
	B (B6)	P954	aureus	CoPS	-	Yes	-	-	-	-	-	Yes	-	-	-	-	-	-	-	-	-	-	-	-	-	Yes	-	-	-	-	Yes	-	-	-	2
	B (B6)	77	aureus	CoPS	-	Yes	-	-	-	-	-	-	-	-	-	-	-	-	-	-	-	-	-	-	-	-	-	-	-	-	Yes	-	-	-	1
	B (B6)	phiSa119	aureus	CoPS	-	Yes	-	-	-	-	-	-	-	-	-	-	-	Yes	-	-	-	-	-	-	-	Yes	-	-	Yes	Yes	-	-	-	-	4
	B (B6)	P1105	aureus	CoPS	-	Yes	-	-	-	-	-	-	-	-	-	-	-	Yes	-	-	-	-	-	-	-	Yes	-	-	Yes	Yes	-	-	-	-	4
	B (B6)	P282	aureus	CoPS	Yes	-	-	-	-	-	-	-	-	-	-	-	-	-	Yes	Yes	Yes	-	-	-	-	-	-	-	-	-	Yes	-	-	-	4
	B (B6)	StauST398-4	aureus	CoPS	Yes	-	-	-	-	-	-	-	-	-	-	-	-	-	-	Yes	Yes	-	-	-	-	-	Yes	-	-	-	-	-	-	-	3
	B (B6)	phiNM3	aureus	CoPS	Yes	-	-	-	-	-	-	-	-	-	-	-	-	Yes	Yes	Yes	Yes	-	-	-	-	-	-	-	-	-	-	-	-	-	4
	B (B6)	23MRA	aureus	CoPS	Yes	-	-	-	-	-	-	-	-	-	-	-	-	-	Yes	Yes	Yes	-	-	-	-	-	-	-	-	-	Yes	Yes	-	-	5
	B (B6)	phiN315	aureus	CoPS	Yes	-	-	-	-	-	-	-	-	-	-	-	-	Yes	Yes	Yes	Yes	-	-	-	-	Yes	-	-	-	-	-	-	-	-	5
	B (B6)	IME1361_01	aureus	CoPS	Yes	-	-	-	-	-	-	-	-	-	-	-	-	-	Yes	Yes	Yes	-	-	-	-	-	-	-	-	-	Yes	-	-	-	4
	B (B6)	phiBU01	aureus	CoPS	Yes	-	-	-	-	-	-	-	-	-	-	-	-	Yes	Yes	Yes	Yes	-	-	-	-	-	-	-	-	-	-	-	-	-	4
	B (B6)	phi5967PVL	aureus	CoPS	-	Yes	-	-	-	-	-	-	-	225-279	1013110-1013135	hypothetical protein	CU118_05010	-	-	-	-	-	-	-	-	-	-	-	Yes	Yes	-	-	-	-	2
	B (B6)	phi7247PVL	aureus	CoPS	-	Yes	-	-	-	-	-	-	-	201-225	1013110-1013135	hypothetical protein	CU118_05010	-	-	-	-	-	-	-	-	-	-	-	Yes	Yes	-	-	-	-	2
NEW	B (B6)	SA1014ruMSSAST7	aureus	CoPS	Yes	-	-		-	-	-	-	-					Yes	Yes	-	Yes	-	-	-	-	-	-		-	-	Yes	-	-	-	4
NEW	B (B6)	phiSa2wa_st22	aureus	CoPS	-	Yes	-		-	-	-	-	-					-	-	-	-	-	-	-	-	-	-		Yes	Yes	-	-	-	-	2
NEW	B (B6)	phiSa2wa_st59	aureus	CoPS	-	Yes	-		-	-	-	-	-					-	-	-	-	-	-	-	-	-	-		Yes	Yes	-	-	-	-	2
NEW	B (B6)	P630	aureus	CoPS	-	Yes	-		-	-	-	-	-					Yes	-	-	-	-	-	-	-	Yes	-		-	-	-	-	-	-	2
NEW	B (B6)	SA345ruMSSAST8	aureus	CoPS	Yes	-	-		-	-	-	-	-					-	Yes	-	Yes	-	-	-	-	Yes	-		-	-	Yes	-	-	-	4
	B (B7)	JS01	aureus	CoPS	Yes	-	-	-	-	-	-	-	-	-	-	-	-	-	Yes	-	Yes	-	-	-	-	Yes	-	-	-	-	-	-	-	-	3
	B (B7)	tp310-1	aureus	CoPS	-	Yes	-	-	-	-	-	-	-	621-649	525352-525380	hypothetical protein	C9J90_02550	-	-	-	-	-	-	-	-	-	-	-	Yes	Yes	-	-	-	-	2
	B (B7)	phiPVL108	aureus	CoPS	-	Yes	-	-	-	-	-	-	-	271-299	1584745-1584773	hypothetical protein	AB477_07900	-	-	-	-	-	-	-	-	-	-	-	Yes	Yes	-	-	-	-	2
	B (B7)	phiPVL-CN125	aureus	CoPS	-	Yes	-	-	-	-	-	-	-	-	-	-	-	-	-	-	-	-	-	-	-	-	-	-	Yes	Yes	-	-	-	-	2
	B (B7)	tp310-3	aureus	CoPS	Yes	-	-	-	-	-	-	-	-	-	-	-	-	-	Yes	Yes	Yes	-	-	-	-	-	-	-	-	-	-	-	-	-	3
	B (B7)	phi13	aureus	CoPS	Yes	-	-	-	-	-	-	-	-	-	-	-	-	-	Yes	-	Yes	-	-	-	-	-	-	-	-	-	-	-	-	-	2
	B (B7)	phiPV83	aureus	CoPS	-	-	Yes	-	-	-	-	-	-	-	-	-	-	-	-	-	-	-	-	-	-	-	-	-	Yes	Yes	-	-	-	-	2
NEW	B (B7)	SA780ruMSSAST101	aureus	CoPS	Yes	-	-	-	-	-	-	-	-					-	Yes	-	Yes	-	-	-	-	Yes	-		-	-	-	-	-	-	3
NEW	B (B7)	SA537ruMSSAST97	aureus	CoPS	Yes	-	-	-	-	-	-	-	-					-	Yes	-	Yes	-	-	-	-	Yes	-		-	-	-	-	-	-	3
NEW	B (B7)	IME1346_01	aureus	CoPS	Yes	-	-	-	-	-	-	-	-					-	Yes	Yes	Yes	-	-	-	-	Yes	-		-	-	-	-	-	-	4
NEW	B (B7)	3 AJ-2017	aureus	CoPS	Yes	-	-	-	-	-	-	-	-					-	Yes	Yes	Yes	-	-	-	-	Yes	-		-	-	-	-	-	-	4
	B (B7)	PVL	aureus	CoPS	-	Yes	-	-	-	-	-	-	-	-	-	-	-	-	-	-	-	-	-	-	-	-	-	-	Yes	Yes	-	-	-	-	2
	B (B8)	phi575	sciuri	CoNS	-	-	-	Yes	-	-	-	-	-	1-43	1113902-1113944	intergenic	-	-	Yes	-	-	-	-	-	-	-	-	-	-	-	-	-	-	-	1
	B (B8)	phi879	sciuri	CoNS	Yes	-	-	-	-	-	-	-	-	1-43	1549941-1549989	tRNA-Arg	CEP64_07725	-	-	-	-	-	-	-	-	-	-	-	-	-	-	-	-	-	0
	B (B9)	IME1367_01	warneri	CoNS	Yes	-	-	-	-	-	-	-	-	1-22	1669093-1669114	tRNA-Arg	A284_t11876	-	-	-	-	-	-	-	-	-	-	-	-	-	-	-	-	-	0
	B (B9)	IME-SA4	haemolyticus	CoNS	Yes	-	-	-	-	-	-	-	-	-	-	-	-	-	-	-	-	-	-	-	-	-	-	-	-	-	-	-	-	-	0
	B (B10)	StB12	hominis	CoNS	-	-	-	-	-	-	-	Yes	-	-	-	-	-	-	-	-	-	-	-	-	-	-	-	-	-	-	-	-	-	-	0
	B (B10)	IME1318_01	haemolyticus	CoNS	Yes	-	-	-	-	-	-	-	-	1-15	2066808-2066822	tmRNA	CYD28_10010	-	-	-	-	-	-	-	-	-	-	-	-	-	-	-	-	-	0
	B (B10)	IME1323_01	capitis	CoNS	Yes	-	-	-	-	-	-	-	-	1-18	1706925-1706942	tRNA-Ser	CRN29_08270	-	-	-	-	Yes	-	-	-	-	-	-	-	-	-	-	-	-	1
	B (B11)	StB27	hominis	CoNS	-	-	-	-	-	-	-	Yes	-	-	-	-	-	-	-	-	-	Yes	-	-	-	-	-	-	-	-	Yes	-	-	-	2
	B (B12)	SpT99F3	pseudintermedius	CoPS	Yes	-	-	-	-	-	-	-	-	-	-	-	-	-	-	-	-	-	-	-	-	-	-	-	-	-	-	-	-	-	0
	B (B13)	StB20	capitis	CoNS	-	-	-	-	-	-	-	Yes	-	-	-	-	-	-	-	-	-	-	-	-	-	-	-	-	-	-	-	-	-	-	0
	B (B13)	StB20-like	epidermidis	CoNS	-	-	-	-	-	-	-	-	-	-	-	-	-	-	-	-	-	-	-	-	-	-	-	-	-	-	-	-	-	-	0
	B (B14)	phiRS7	saprophyticus	CoNS	Yes	-	-	-	-	-	-	-	-	-	-	-	-	-	-	-	-	-	-	-	-	-	-	-	-	-	-	-	-	-	0
	B (B15)	2638A	aureus	CoPS	Yes	-	-	-	-	-	-	-	-	-	-	-	-	-	-	-	-	-	Yes	-	-	-	-	-	-	-	-	-	-	-	1
	B (B16)	IME1354_01	spp.	-	Yes	-	-	-	-	-	-	-	-	1-14	1013044-1013057	tRNA-Ser	A284_t11874	-	-	-	-	-	-	-	-	-	-	-	-	-	-	-	Yes	-	1
	B (B17)	vB_SauS_IMEP5	aureus	CoPS	Yes	-	-	-	-	-	-	-	-	-	-	-	-	-	-	-	-	-	-	-	-	-	-	-	-	-	-	-	-	-	0
	D (D1)	6ec	epidermidis	CoNS	-	-	-	-	-	-	Yes	-	-	-	-	-	-	-	-	-	-	-	-	-	-	-	-	-	-	-	-	-	-	-	0
	D (D1)	vB_SepS_SEP9	epidermidis	CoNS	-	-	-	-	-	-	Yes	-	-	-	-	-	-	-	-	-	-	-	-	-	-	-	-	-	-	-	-	-	-	-	0
NEW	D (D2)	vB_StaM_SA2	aureus	CoPS	-	-	-	-	-	-	Yes	-						-		-	-	-	-	-	-	-	-		-	-	-	-	-	-	0
	Singleton	SPbeta-like	epidermidis	CoNS	-	-	-	-	Yes	Yes	-	-	Yes	-	-	-	-	-	-	-	-	-	-	-	-	-	-	-	-	-	-	-	-	-	0
					38	40	27	1	1	1	3	25	1					7	16	10	17	45	23	1	1	12	1	10	27	26	8	1	2	5	212	Total of genes
